# Supplementary material
Source: PubMed Central journal article supplement (PMC6301146)

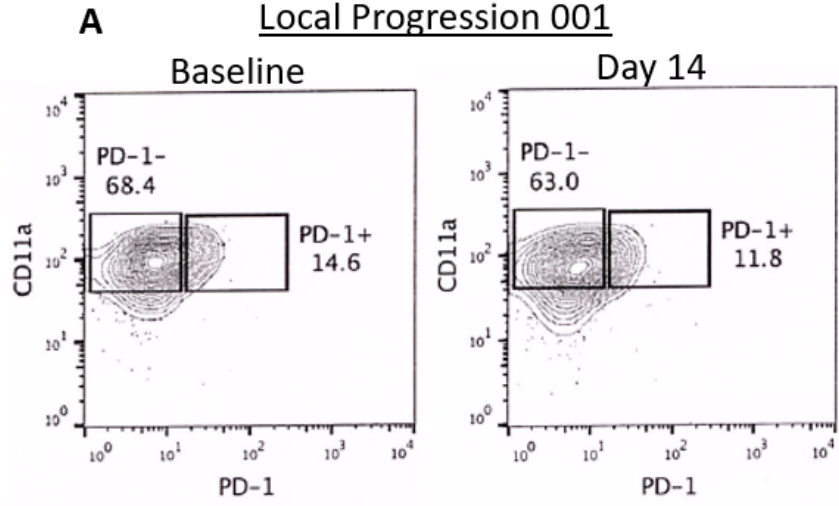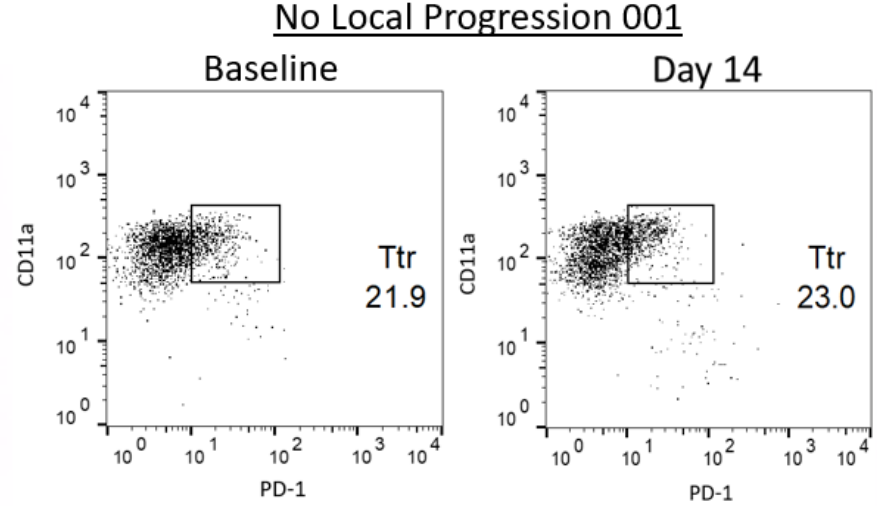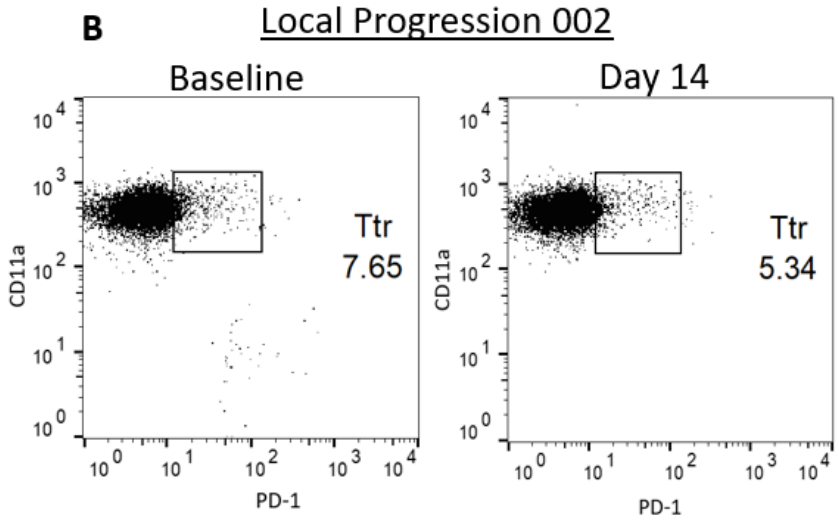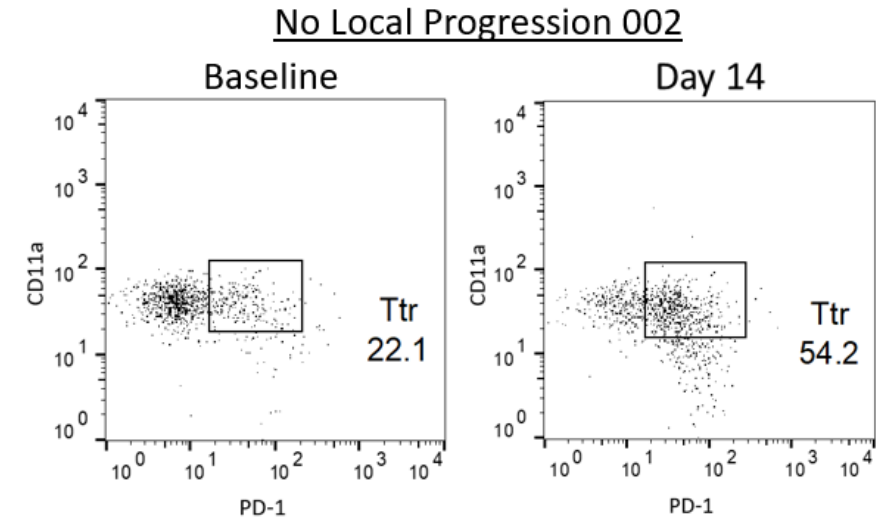

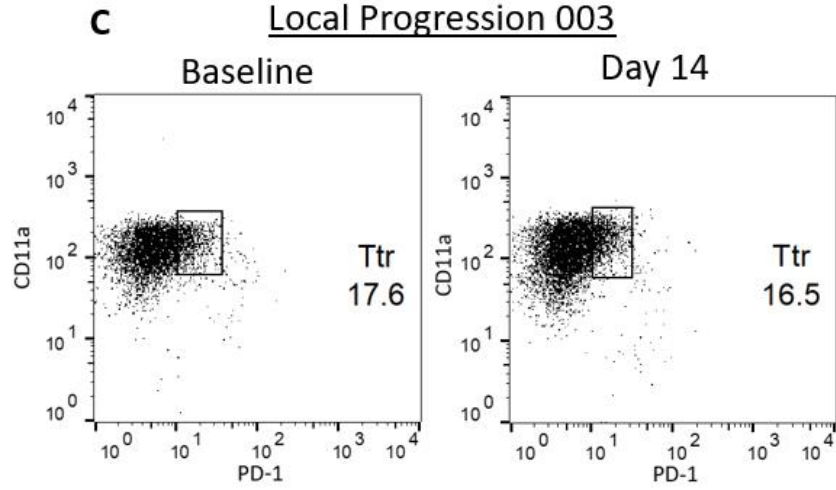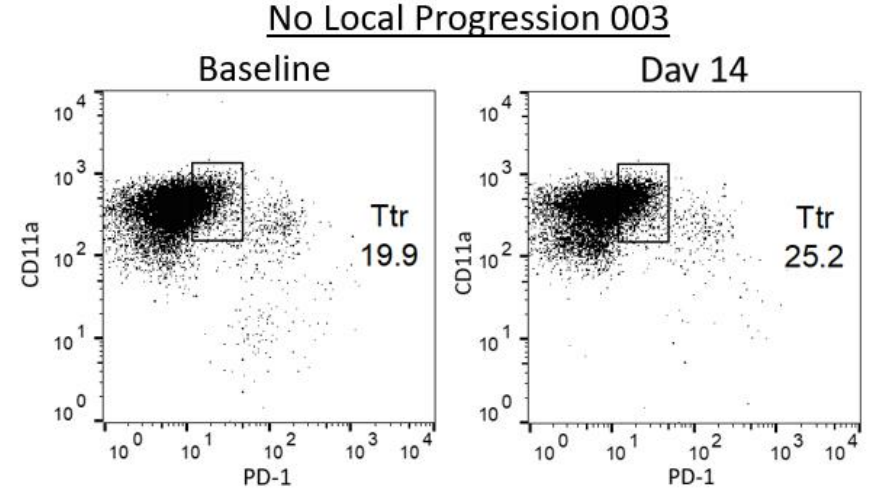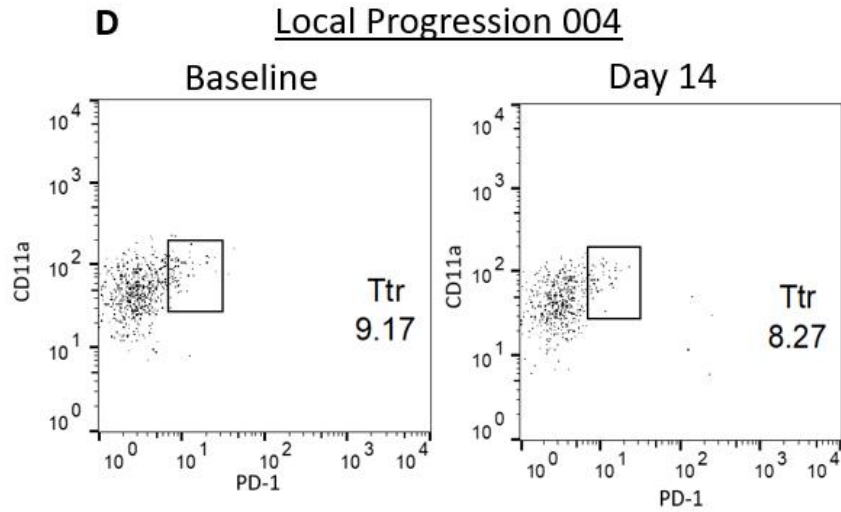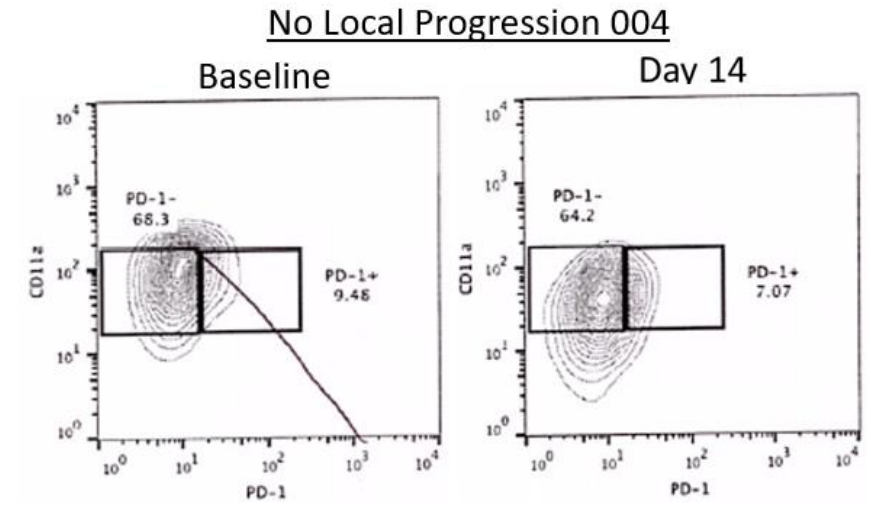

**E** Local Progression 005

No Local Progression 005

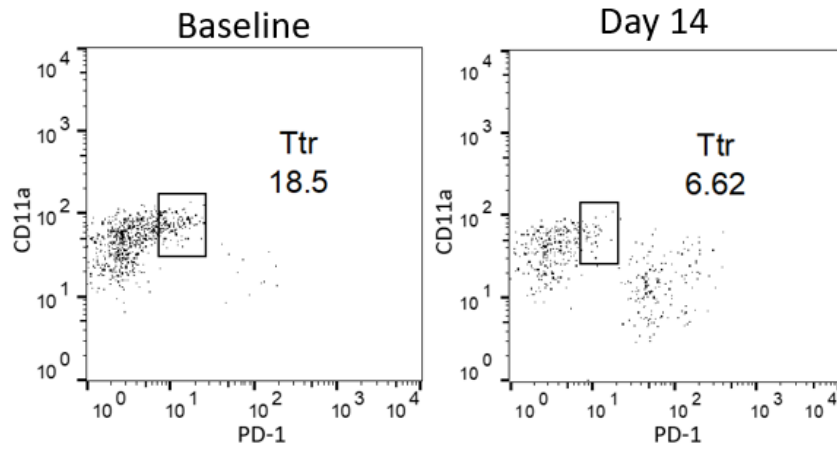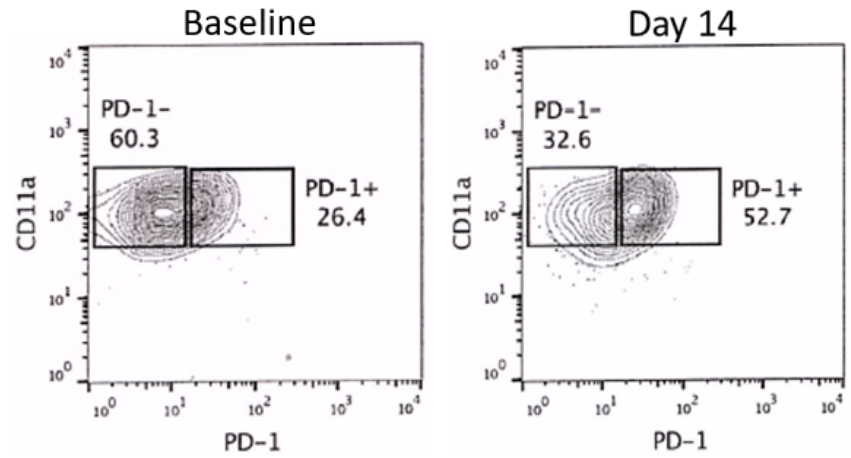

**F** Local Progression 006

No Local Progression 006

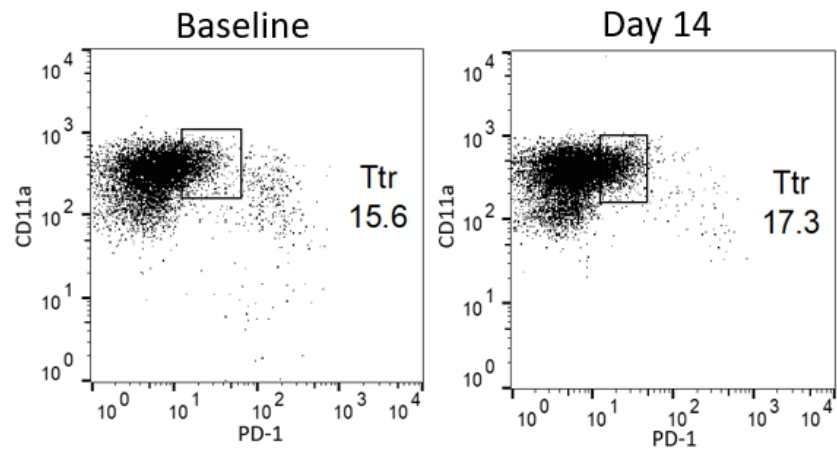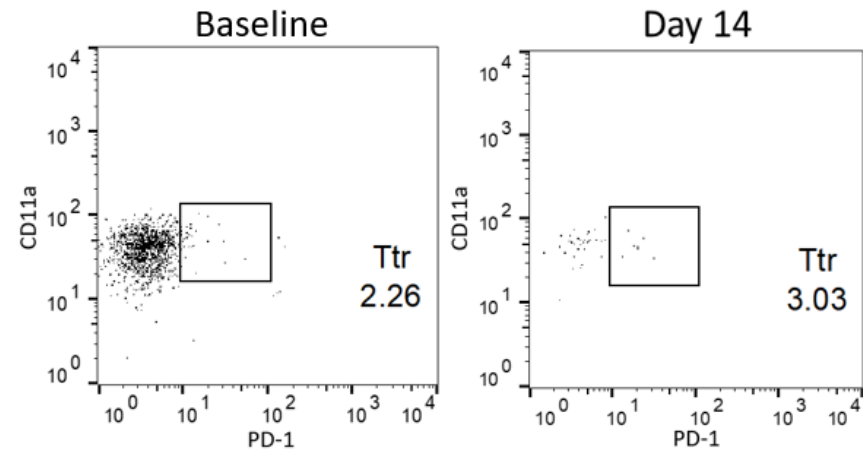

**G**

Local Progression 007

No Local Progression 007

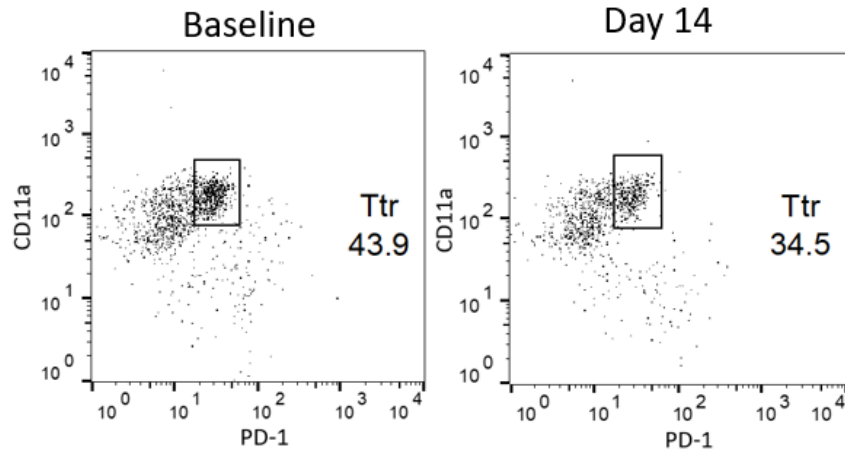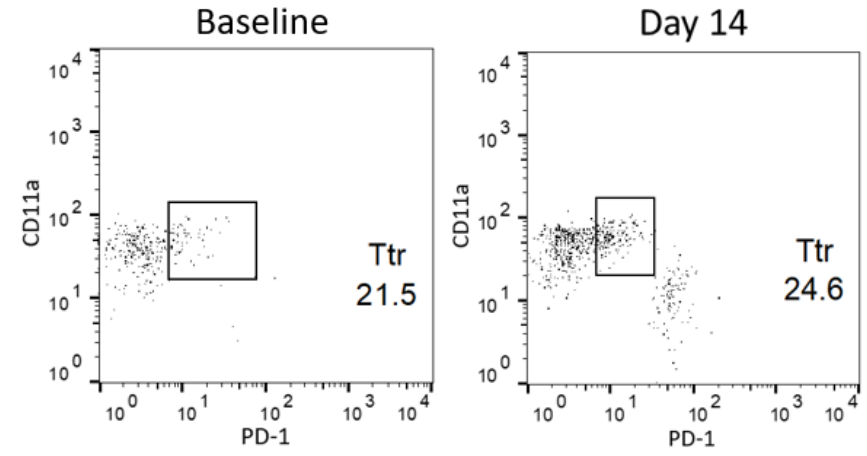

Supplement: NIHMS1513188-supplement-2.pdf [file NIHMS1513188-supplement-2.pdf]
