# Supplementary material
Source: PubMed Central journal article supplement (PMC6301146)

**A** Death 001

Baseline

Day 14

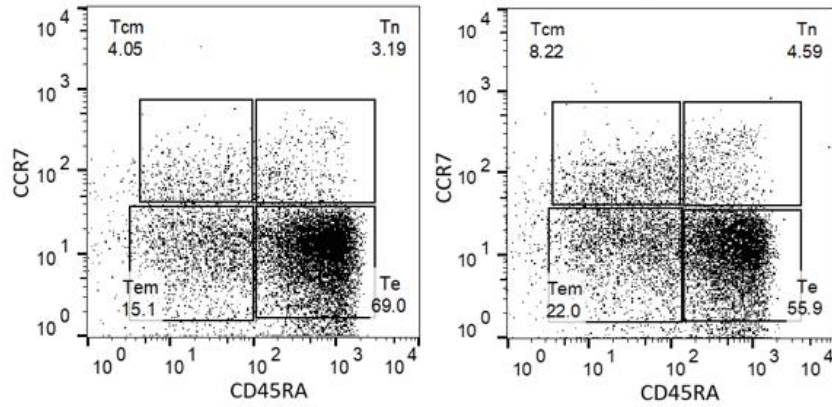

No Death 001

Baseline

Day 14

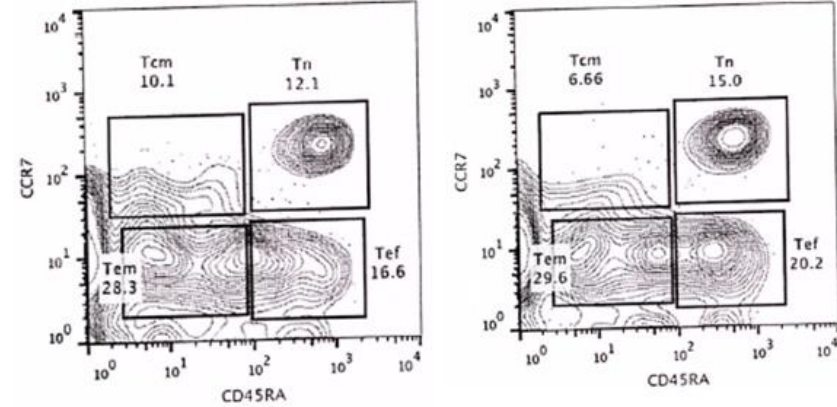

**B** Death 002

Baseline

Day 14

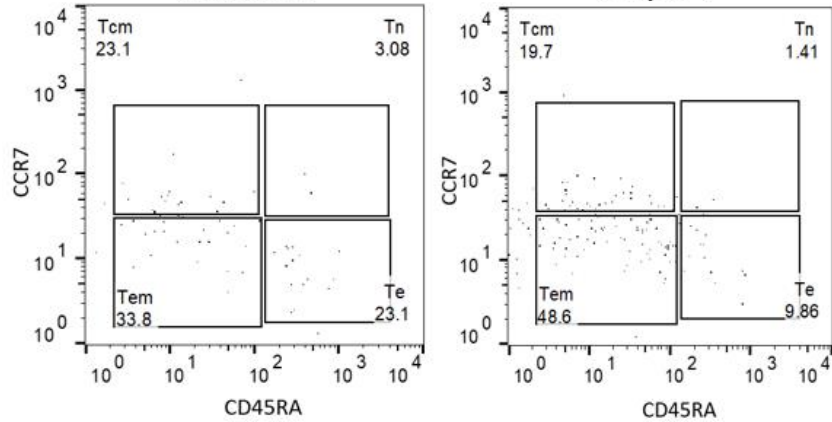

No Death 002

Baseline

Day 14

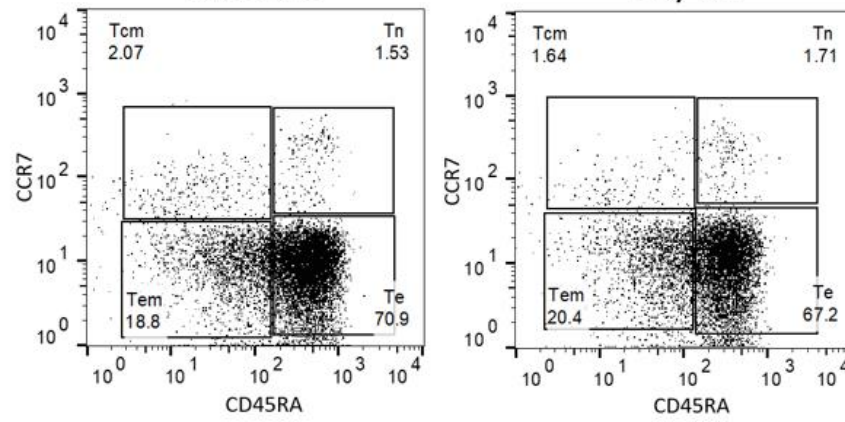

**C**Death 003No Death 003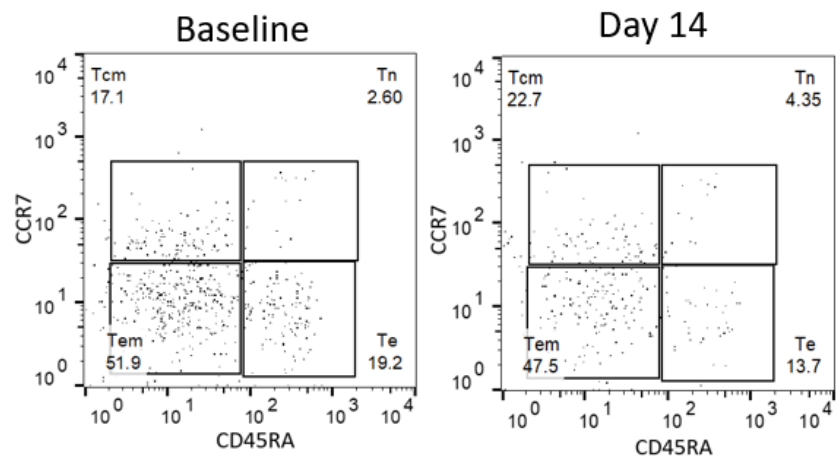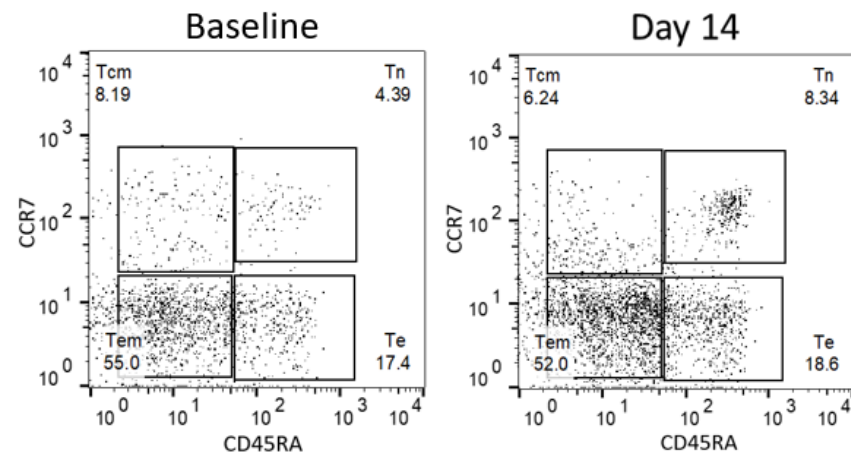**D**Death 004No Death 004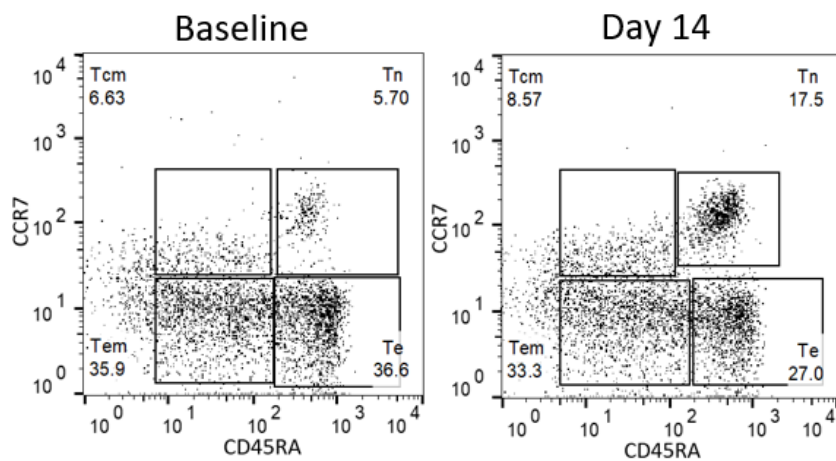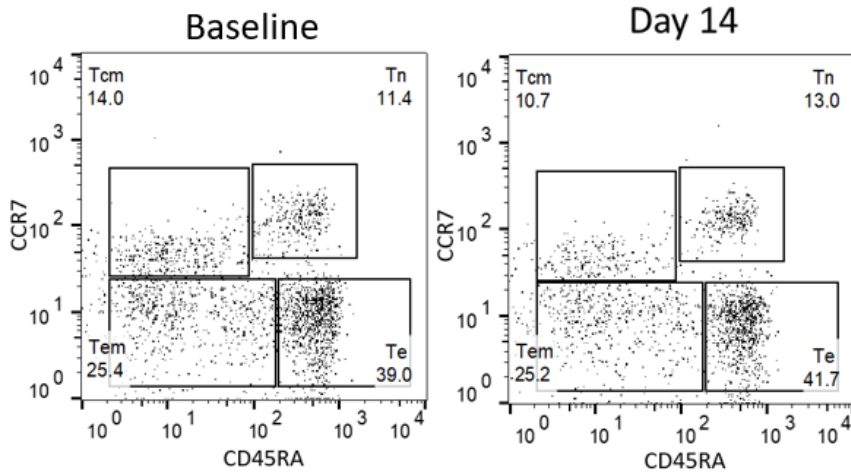

**E** Death 005

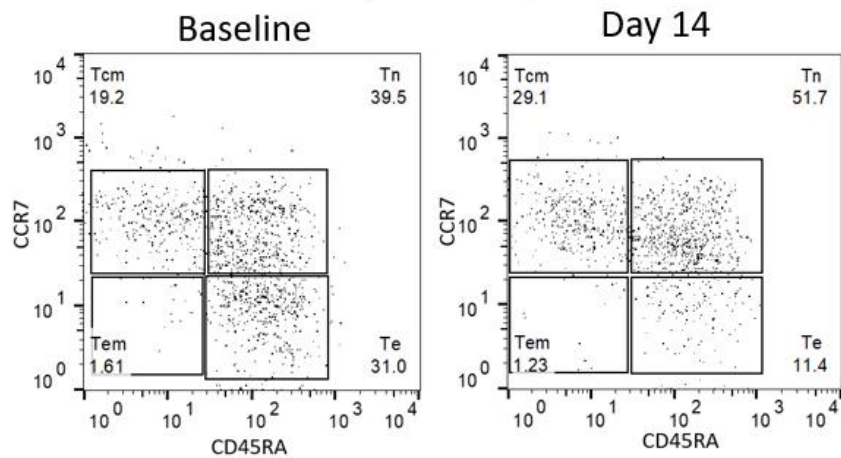

No Death 005

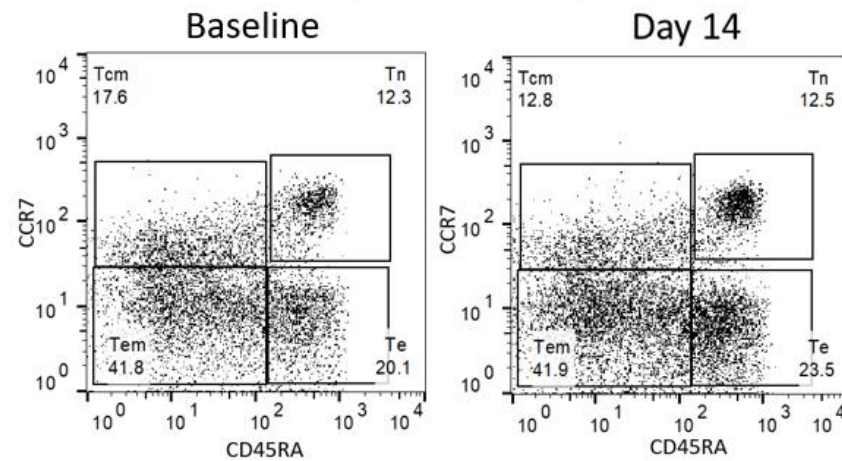

**F** Death 006

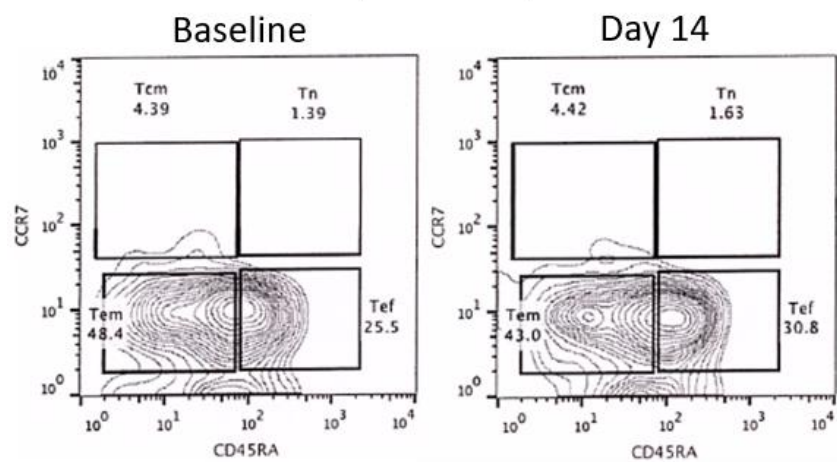

No Death 006

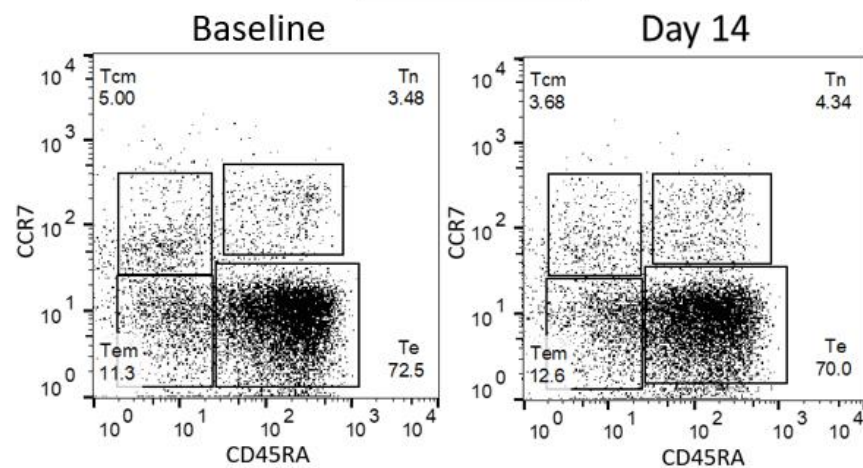

**G**

Death 007

No Death 007

Baseline

Day 14

Baseline

Day 14

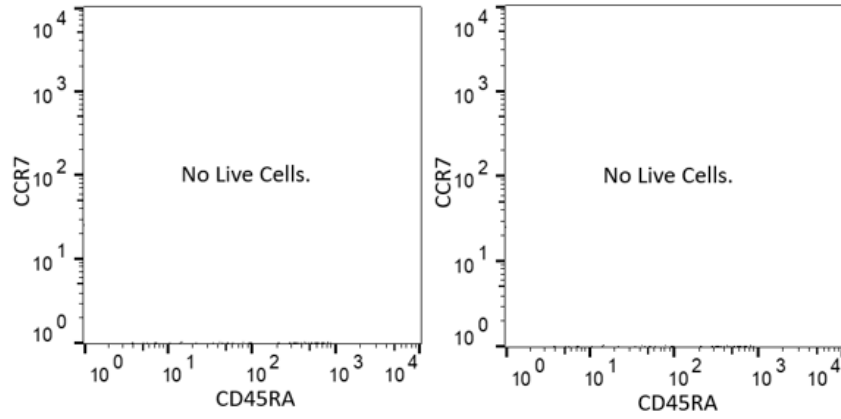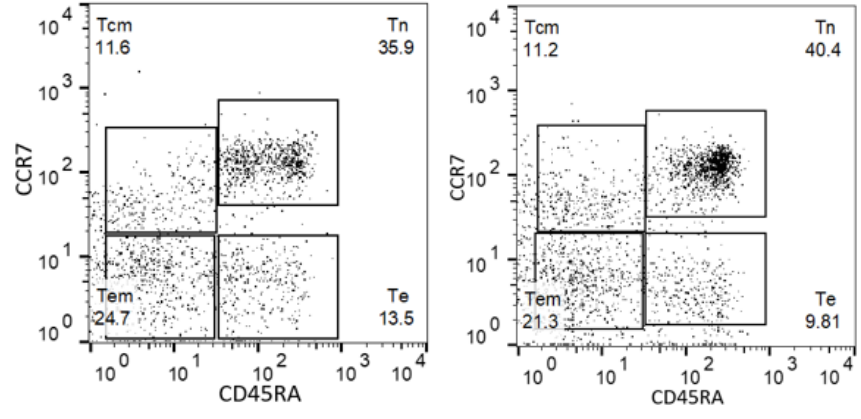

Supplement: NIHMS1513188-supplement-3.pdf [file NIHMS1513188-supplement-3.pdf]
