# Supplementary material
Source: PubMed Central journal article supplement (PMC6301146)

Supplementary Figure 1

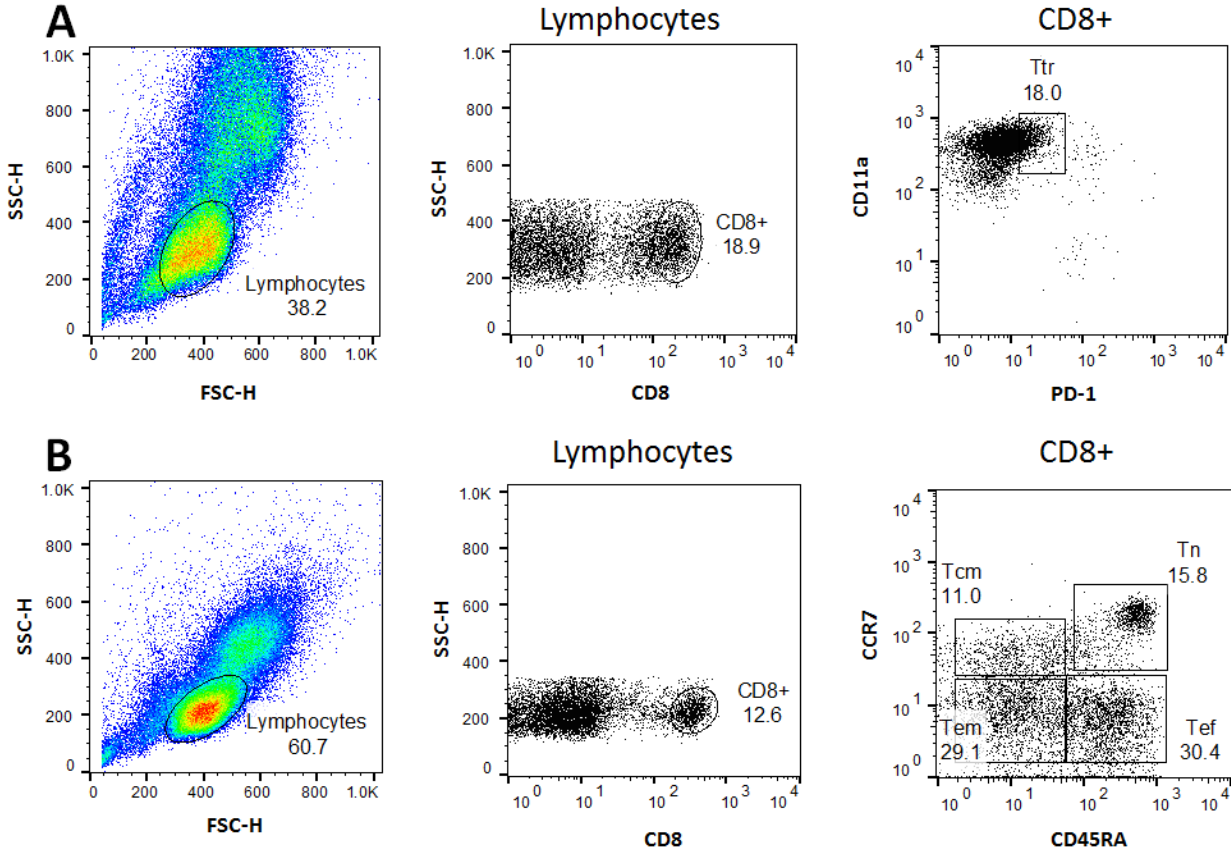

Supplement: NIHMS1513188-supplement-1.pdf [file NIHMS1513188-supplement-1.pdf]
